# Supplementary material
Source: PubMed Central journal article supplement (PMC9463795)
Supplement: 12967_2022_3622_MOESM5_ESM.pdf [file 12967_2022_3622_MOESM5_ESM.pdf]

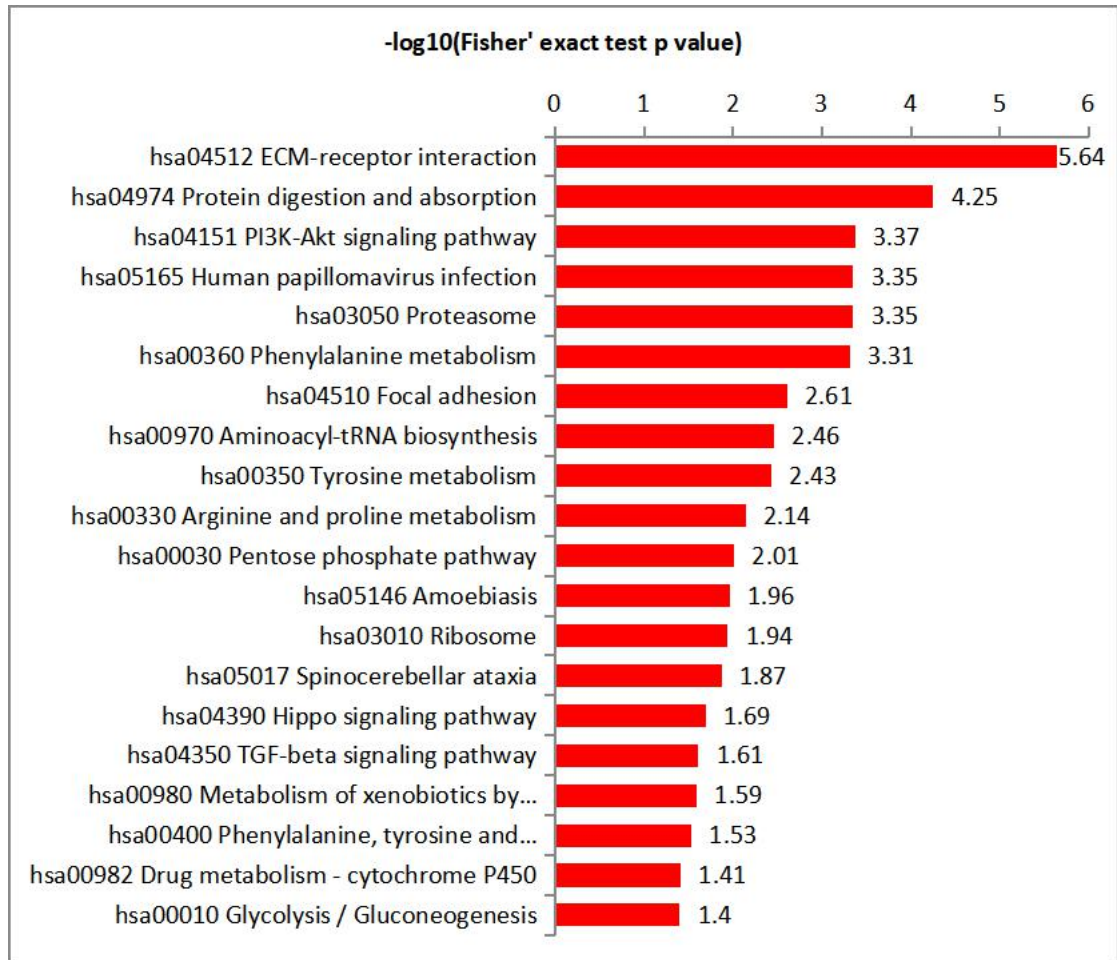

Supplemental Figure 2. KEGG pathways were generated based on the differentially expressed proteins between Bowen disease and healthy control.
