# Supplementary material
Source: PubMed Central journal article supplement (PMC9463795)
Supplement: 12967_2022_3622_MOESM7_ESM.pdf [file 12967_2022_3622_MOESM7_ESM.pdf]

|         |          | expression | relative expression |      |
|---------|----------|------------|---------------------|------|
|         | GAPDH    |            |                     |      |
|         | 1        | 18524.104  |                     |      |
|         | 2        | 19888.368  |                     |      |
|         | 3        | 18927.953  |                     |      |
|         | 4        | 18348.418  |                     |      |
|         | 5        | 21198.296  |                     |      |
|         | 6        | 25287.317  |                     |      |
|         | COL3A1   |            |                     |      |
| CSCC    | 1        | 14450.518  | 0.780092684         | 0.78 |
|         | 2        | 12492.69   | 0.628140529         | 0.63 |
| BD      | 3        | 25840.761  | 1.365216883         | 1.37 |
|         | 4        | 23270.782  | 1.268271848         | 1.27 |
| Control | 5        | 13558.347  | 0.639596079         | 0.64 |
|         | 6        | 10953.468  | 0.433160544         | 0.43 |
|         | COL2A1   |            |                     |      |
| CSCC    | 1        | 12124.468  | 0.654523857         | 0.65 |
|         | 2        | 7826.447   | 0.393518815         | 0.39 |
| BD      | 3        | 20035.246  | 1.058500409         | 1.06 |
|         | 4        | 23781.589  | 1.296111142         | 1.30 |
| Control | 5        | 26650.66   | 1.257207655         | 1.26 |
|         | 6        | 24891.589  | 0.984350732         | 0.98 |
|         | CD36     |            |                     |      |
| CSCC    | 1        | 11603.589  | 0.626404872         | 0.63 |
|         | 2        | 16413.347  | 0.825273698         | 0.83 |
| BD      | 3        | 22277.125  | 1.17694317          | 1.18 |
|         | 4        | 25811.953  | 1.406767221         | 1.41 |
| Control | 5        | 24156.489  | 1.139548622         | 1.34 |
|         | 6        | 24207.075  | 0.957281273         | 0.96 |
|         | TNC      |            |                     |      |
| CSCC    | 1        | 29638.489  | 1.599995822         | 1.60 |
|         | 2        | 28032.539  | 1.409494183         | 1.41 |
| BD      | 3        | 20674.104  | 1.092252501         | 1.09 |
|         | 4        | 22377.903  | 1.219609396         | 1.22 |
| Control | 5        | 16945.125  | 0.7993626           | 0.80 |
|         | 6        | 15858.225  | 0.627121691         | 0.63 |
|         | SEPRINB1 |            |                     |      |
| CSCC    | 1        | 26058.64   | 1.406742264         | 1.41 |
|         | 2        | 27215.468  | 1.368411325         | 1.37 |
| BD      | 3        | 20320.368  | 1.073563951         | 1.07 |
|         | 4        | 17196.368  | 0.937212571         | 0.94 |
| Control | 5        | 20508.853  | 0.96747649          | 0.97 |
|         | 6        | 6541.418   | 0.25868375          | 0.26 |
|         | FSCN1    |            |                     |      |
| CSCC    | 1        | 30146.539  | 1.627422249         | 1.63 |
|         | 2        | 27929.368  | 1.404306678         | 1.40 |

|  |         |       |           |             |      |
|--|---------|-------|-----------|-------------|------|
|  | BD      | 3     | 15496.418 | 0.818705435 | 0.82 |
|  |         | 4     | 12623.953 | 0.688013157 | 0.69 |
|  | Control | 5     | 3339.326  | 0.157528039 | 0.16 |
|  |         | 6     | 2378.669  | 0.094065693 | 0.09 |
|  |         | ACTN1 |           |             |      |
|  | CSCC    | 1     | 35449.075 | 1.913672856 | 1.91 |
|  |         | 2     | 30775.468 | 1.547410426 | 1.55 |
|  | BD      | 3     | 18415.104 | 0.972905205 | 0.97 |
|  |         | 4     | 23943.489 | 1.304934791 | 1.30 |
|  | Control | 5     | 18450.468 | 0.870375053 | 0.87 |
|  |         | 6     | 18703.761 | 0.739649881 | 0.73 |
|  |         | RAB31 |           |             |      |
|  | CSCC    | 1     | 27699.711 | 1.495333378 | 1.50 |
|  |         | 2     | 31015.539 | 1.559481351 | 1.56 |
|  | BD      | 3     | 17248.347 | 0.911263199 | 0.91 |
|  |         | 4     | 17747.761 | 0.967263826 | 0.97 |
|  | Control | 5     | 16503.882 | 0.778547578 | 0.78 |
|  |         | 6     | 17097.033 | 0.676110993 | 0.68 |

|             |      |      |
|-------------|------|------|
| 0.704116606 | 0.70 | MEAN |
| 0.107446399 | 0.11 | STD  |
| 1.316744365 | 1.32 | MEAN |
| 0.068550492 | 0.07 | STD  |
| 0.536378312 | 0.54 | MEAN |
| 0.145971966 | 0.15 | STD  |
| 0.524021336 | 0.52 | MEAN |
| 0.184558435 | 0.18 | STD  |
| 1.177305775 | 1.18 | MEAN |
| 0.16801616  | 0.17 | STD  |
| 1.120779193 | 1.12 | MEAN |
| 0.19293898  | 0.19 | STD  |
| 0.729823003 | 0.73 | MEAN |
| 0.134987667 | 0.06 | STD  |
| 1.291855195 | 1.29 | MEAN |
| 0.162510145 | 0.16 | STD  |
| 1.148414947 | 1.15 | MEAN |
| 0.270303835 | 0.13 | STD  |
| 1.505       | 1.51 | MEAN |
| 0.134350288 | 0.13 | STD  |
| 1.155       | 1.15 | MEAN |
| 0.091923882 | 0.09 | STD  |
| 0.713242145 | 0.71 | MEAN |
| 0.121792714 | 0.12 | STD  |
| 1.388371132 | 1.39 | MEAN |
| 0.025980704 | 0.03 | STD  |
| 1.003606285 | 1.00 | MEAN |
| 0.093894892 | 0.09 | STD  |
| 0.61308012  | 0.61 | MEAN |
| 0.501192152 | 0.50 | STD  |
| 1.515864464 | 1.52 | MEAN |
| 0.157766533 | 0.16 | STD  |

|             |      |      |
|-------------|------|------|
| 0.753359296 | 0.75 | MEAN |
| 0.092413396 | 0.09 | STD  |
| 0.125796866 | 0.13 | MEAN |
| 0.044874655 | 0.04 | STD  |
| 1.730541641 | 1.73 | MEAN |
| 0.258986648 | 0.26 | STD  |
| 1.138919998 | 1.14 | MEAN |
| 0.234780371 | 0.23 | STD  |
| 0.8         | 0.80 | MEAN |
| 0.098994949 | 0.09 | STD  |
| 1.527407364 | 1.53 | MEAN |
| 0.045359467 | 0.05 | STD  |
| 0.939263513 | 0.94 | MEAN |
| 0.039598423 | 0.04 | STD  |
| 0.727329285 | 0.73 | MEAN |
| 0.072433604 | 0.07 | STD  |
